# Supplementary material for: JAK Inhibition in a Patient with X-Linked Reticulate Pigmentary Disorder
Source: Springer Nature journal article supplement (doi:10.1007/s10875-020-00867-7), 2020-09-28
Supplement: MOESM1 [file 18424588]

# Length-for-age BOYS

Birth to 2 years (percentiles)

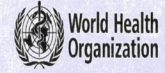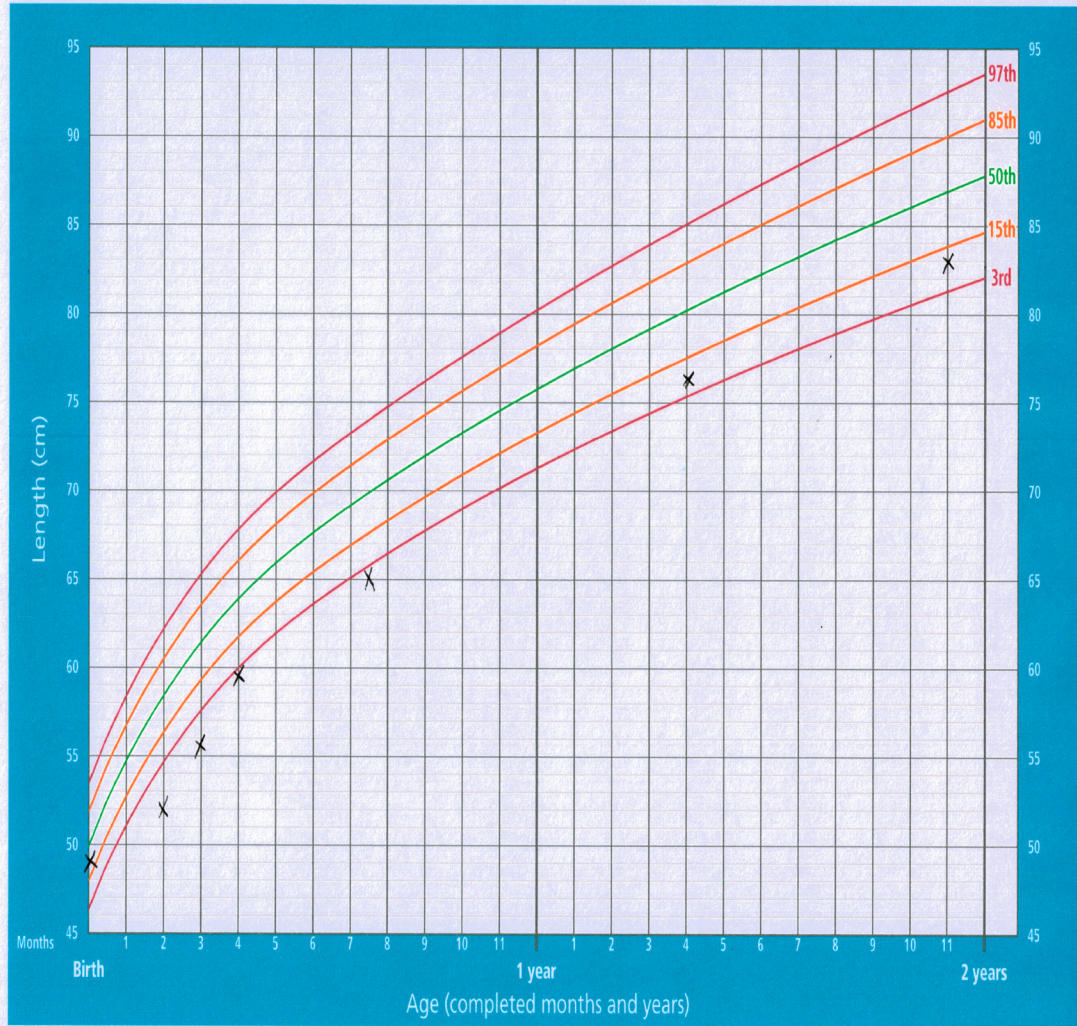

WHO Child Growth Standards

# Weight-for-age BOYS

Birth to 2 years (percentiles)

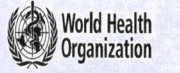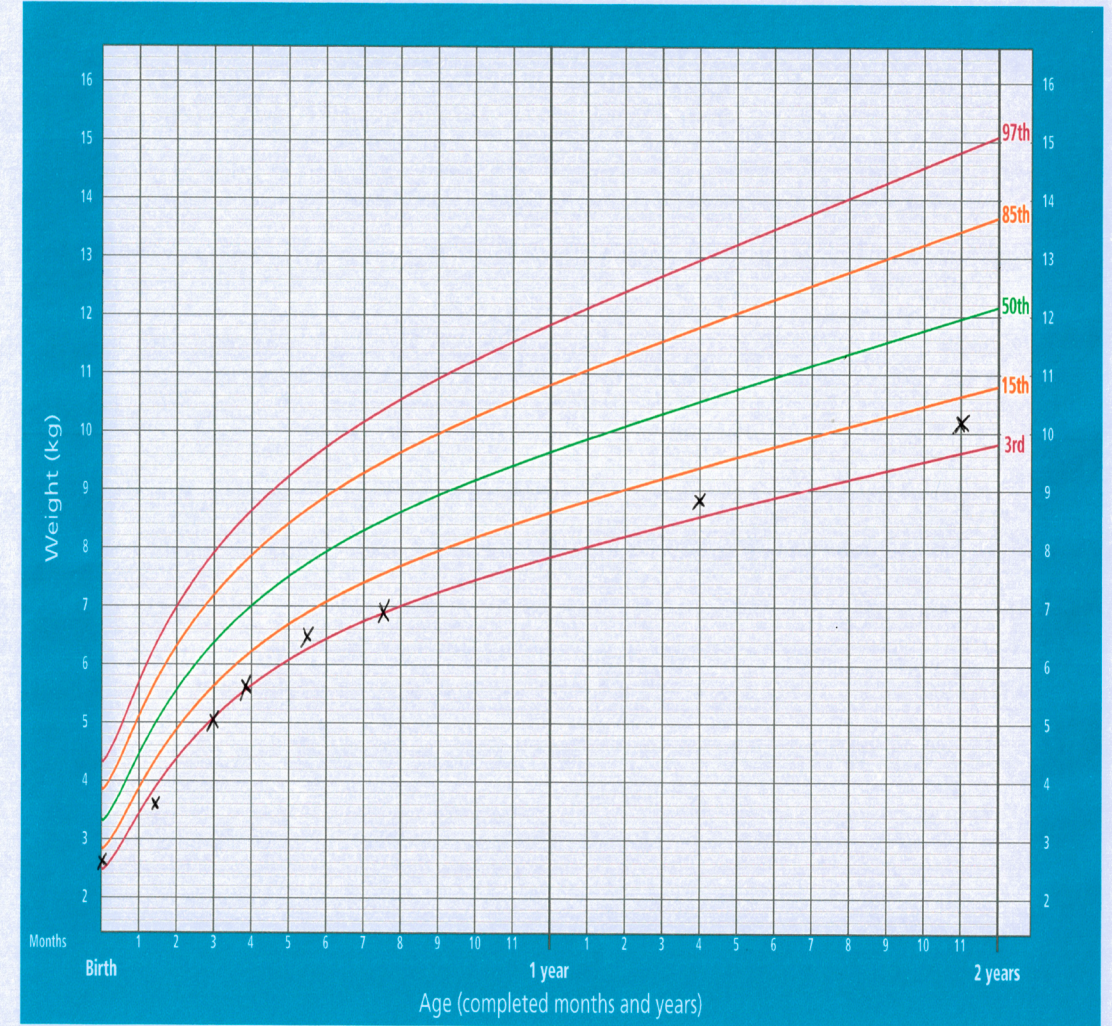

WHO Child Growth Standards
