# Supplementary material for: JAK Inhibition in a Patient with X-Linked Reticulate Pigmentary Disorder
Source: Springer Nature journal article supplement (doi:10.1007/s10875-020-00867-7), 2020-09-28

Figure S2

Healthy control

Disease control

XLPDR

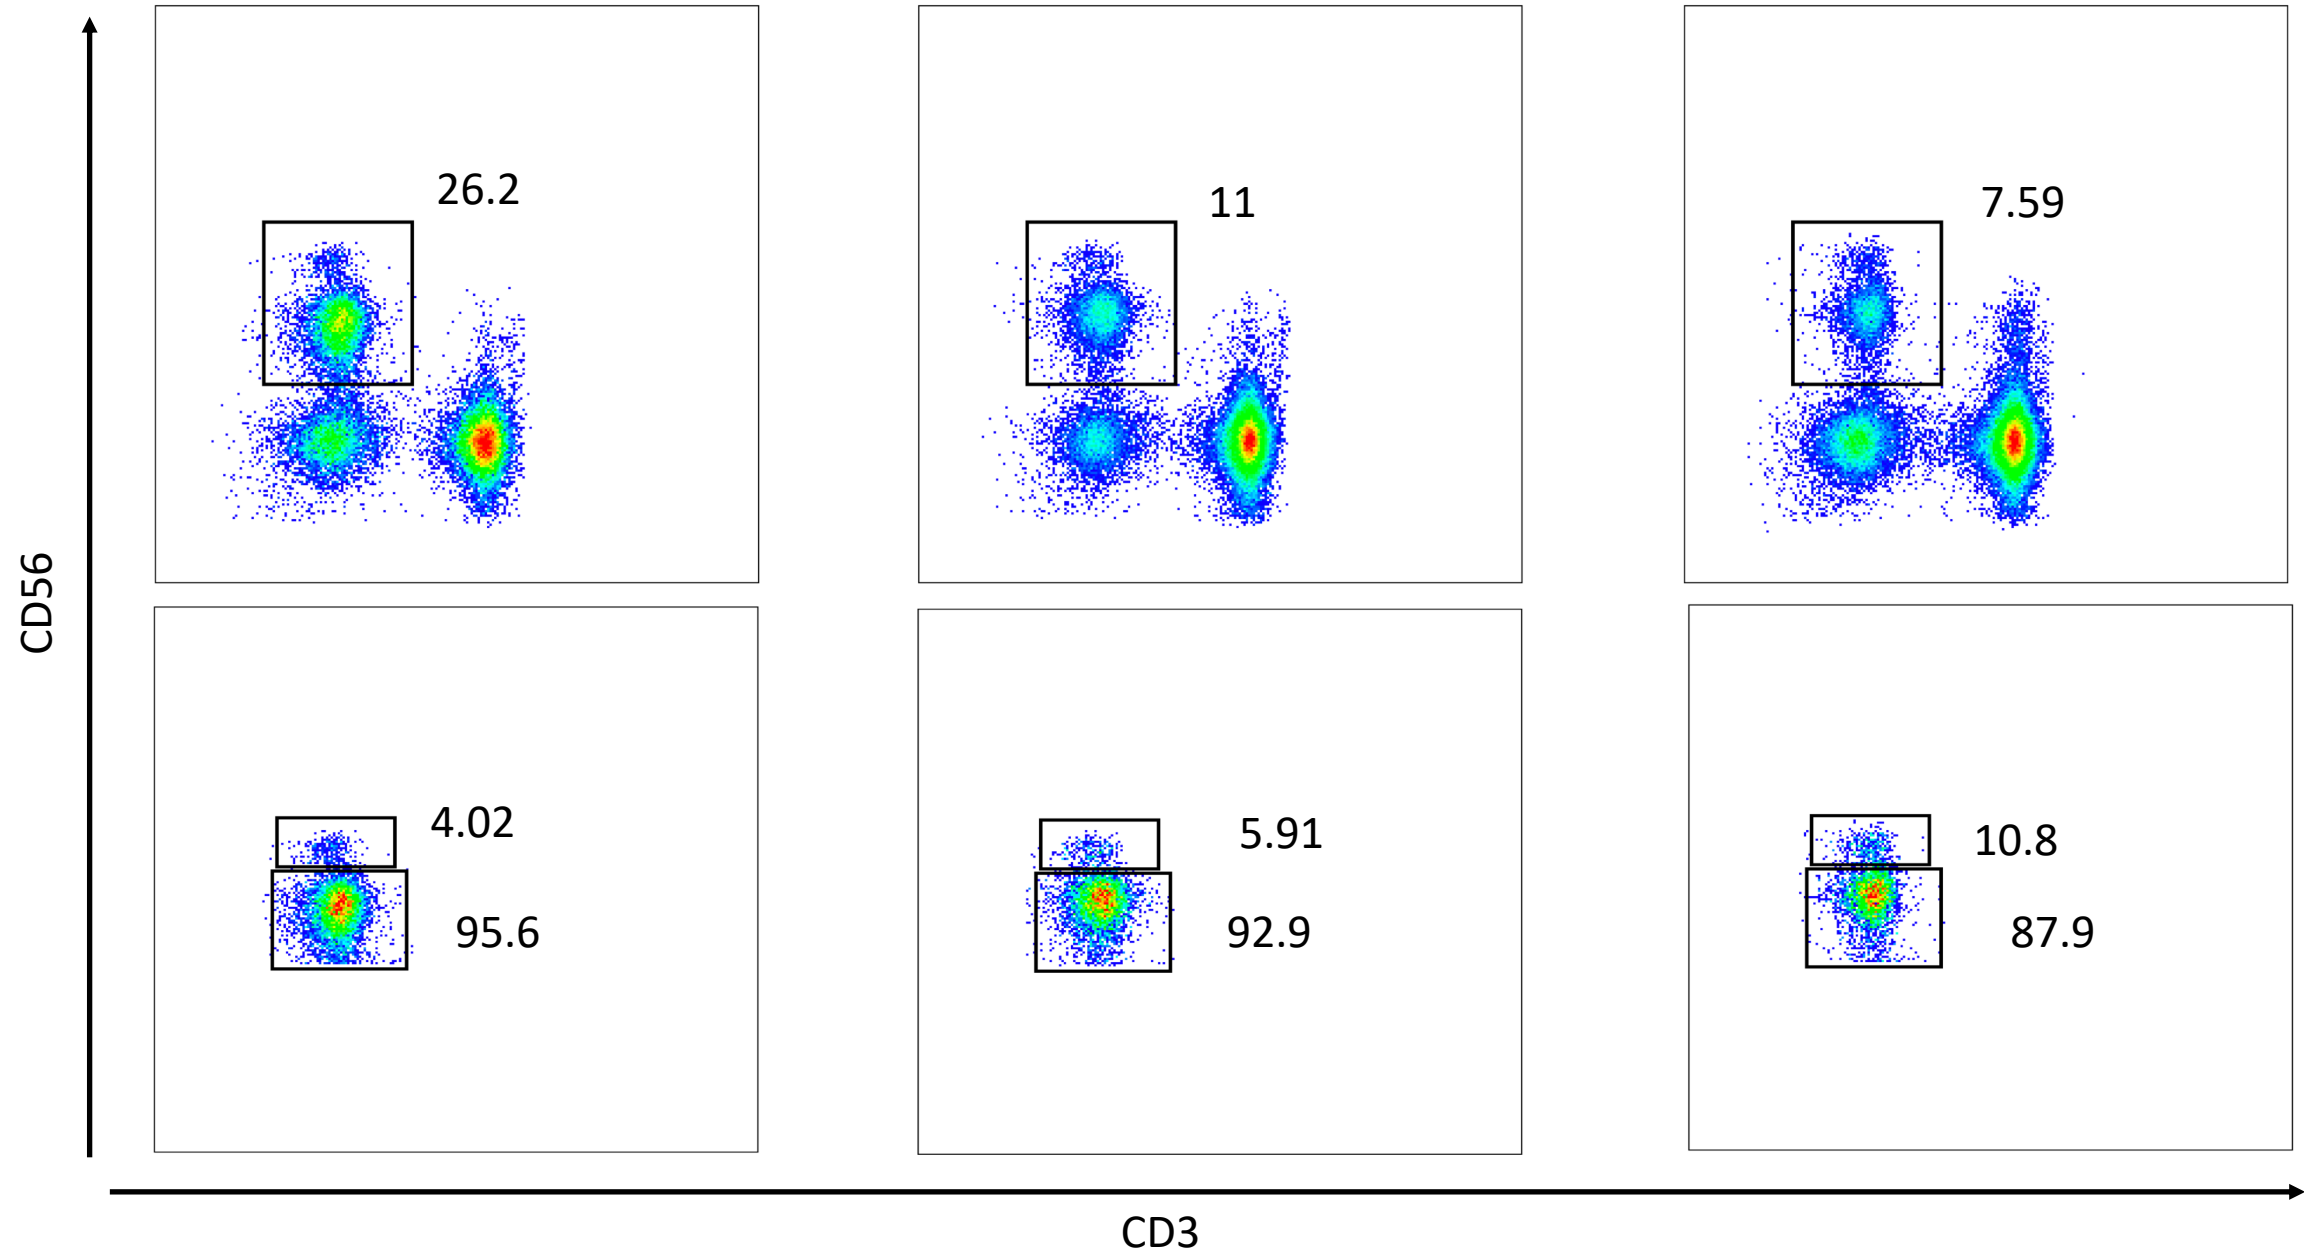

Supplement: MOESM2 [file 18424588]
